# Supplementary material for: Graphitized carbon dots emitting strong green photoluminescence
Source: Royal Society of Chemistry journal article supplement (doi:10.1039/c3tc30670d), 2013-01-01
Supplement: c3tc30670d.pdf [file c3tc30670d.pdf]

## Supporting Information

### Graphitized Carbon Dots Emitting Strong Green Photoluminescence

Yun Liu, Chun-yan Liu\* and Zhi-ying Zhang

*Key Laboratory of Photochemical Conversion and Optoelectronic Materials*

*Technical Institute of Physics and Chemistry, Chinese Academy of Sciences,*

*Beijing 100190, People's Republic China*

#### 1. XRD spectrum of GCDs

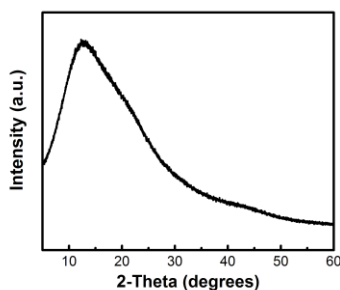

Fig. S1 XRD pattern of GCDs

#### 2. Effect of pH on the UV-Vis absorption spectra of the GCDs aqueous solution

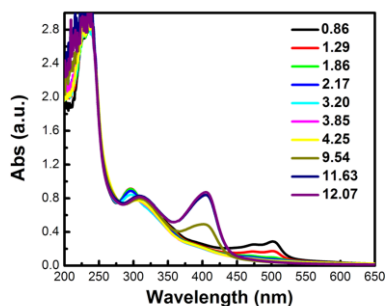

Fig. S2 Effects of pH on the UV-Vis spectra of the GCDs aqueous solution.

#### 3. Quantum Yield ( $\Phi_f$ ) Measurements:

Considering the green emission of GCDs in the range of 500 ~ 600 nm, fluorescein in 0.1 mol/L NaOH aqueous solution was chosen as reference to calculate their relative  $\Phi_f$  with the following equation:

$$(\Phi_f)_x = (\Phi_f)_{\text{std}} (m_x/m_{\text{std}})(\eta_x^2/\eta_{\text{std}}^2)$$

Where subscripts of x and std denoted test and standard,  $\Phi_f$  is the relative fluorescence quantum yield; m is the gradient from the plot of the integrated fluorescence intensity vs the absorbance at the excitation wavelength;  $\eta$  is the refractive index of solvent. The procedures in detail could be found in the “A Guide to Recording Fluorescence Quantum Yields”<sup>1</sup> and reference 2.

To avoid the effect of re-absorption on the calculation of relative  $\Phi_f$ , the absorbance of GCDs and fluorescein were controlled to be smaller than 0.05 at the excitation wavelength. Fluorescein standard solution was freshly prepared just before use.

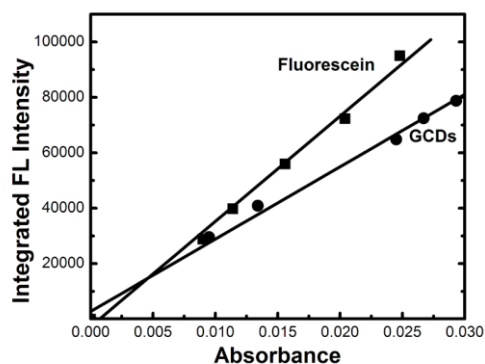

Fig. S3 Linear plots of integrated fluorescence intensities vs absorbance at 490 nm.

Table S1 Relative  $\Phi_f$  of GCDs at 490 nm

| sample                   | m                  | r     | $(\Phi_f)_x$ (%)                         |
|--------------------------|--------------------|-------|------------------------------------------|
| Fluorescein in 0.1 mol/L | $3.80 \times 10^6$ | 0.994 | 90                                       |
| NaOH solution            |                    |       | $\eta_x \sim 1.33, \eta_{std} \sim 1.33$ |
| GCDs in aqueous solution | $2.61 \times 10^6$ | 0.997 | 62%                                      |

#### 4. Relative fluorescence intensity of GCDs in HCl aqueous solutions

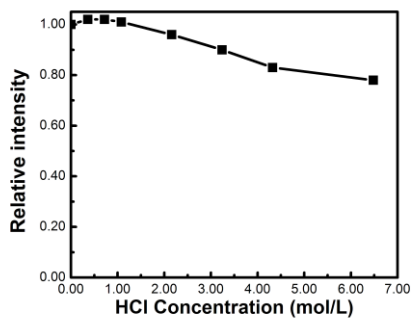

Fig. S4 the relationship of relative fluorescent intensities of GCDs and the concentration of HCl (excitation wavelength: 490 nm)

#### 5. Photocatalytic degradation of MB

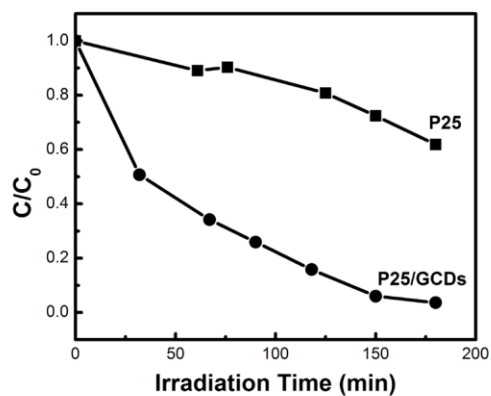

Fig. S5 Under the illumination of visible light, the degradation of MB in the presence of P25 and P25/GCDs composite photocatalyst

## 6. Effects of synthetic parameters on the optical properties of GCDs prepared

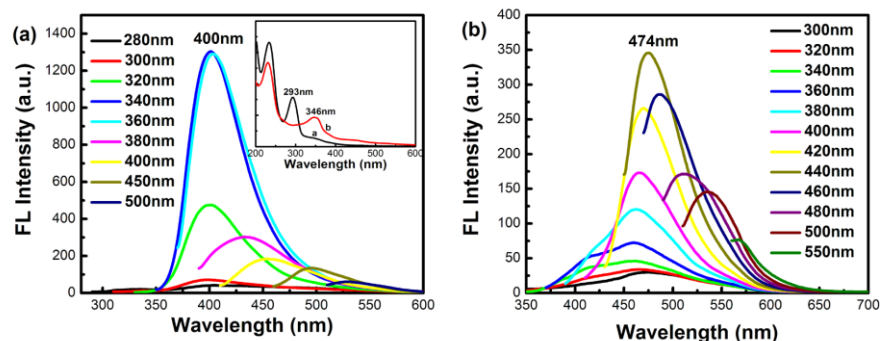

Fig. S6 Fluorescent spectra of the GCDs prepared at 140 °C (a) and room temperature (b) at different excitation wavelength. Curves a and b in the insert were corresponding to the absorption spectrum of the GCDs prepared at 140 °C and room temperature.

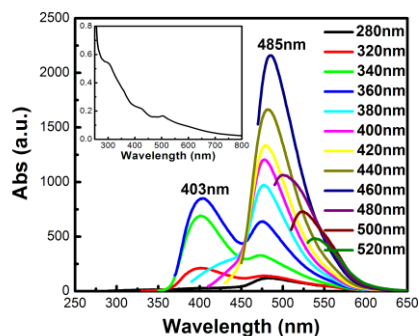

Fig. S7 Fluorescent spectra of the GCDs prepared at 80 °C with a lower concentration of H<sub>2</sub>SO<sub>4</sub> (the volume ratio of H<sub>2</sub>SO<sub>4</sub> to EG ~ 3.5:5). The insert was the absorption spectrum of GCDs.

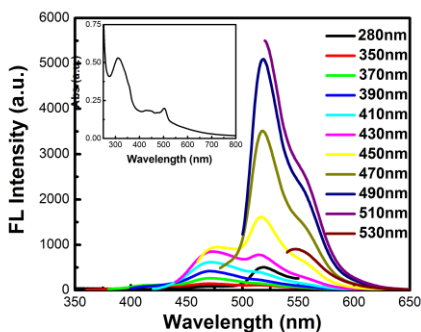

Fig. S8 Fluorescent spectra of the GCDs prepared at 80 °C for 2 hours.

The insert was the corresponding absorption spectrum.

## Reference

1. The manual of "A Guide to Recording Fluorescence Quantum Yields" by HORIBA Jobin Yvon IBH Ltd.
2. Bao L.; Zhang Z.-L.; Tian Z.-Q.; Zhang L.; Liu C.; Lin Y.; Qi B.; Pang D.-W. *Adv. Mater.* 2011, **53**, 5801-5806.
